# Supplementary material for: Forecasting the West Nile Virus in the United States: An Extensive Novel Data Streams–Based Time Series Analysis and Structural Equation Modeling of Related Digital Searching Behavior
Source: PubMed Central journal article supplement (PMC6416538; doi:10.2196/publichealth.9176), 2019-02-28
Supplement: publichealth_v5i1e9176_app1.pdf [file publichealth_v5i1e9176_app1.pdf]

**Different tested seasonal autoregressive integrated average (SARIMAX) models for forecasting the West Nile virus in the United States using Google Trends-generated data.<sup>a</sup>**

| Model                       | Fitting parameter |        |        |        |                       |        |            |        |        |        |         |
|-----------------------------|-------------------|--------|--------|--------|-----------------------|--------|------------|--------|--------|--------|---------|
|                             | SSE               | MSE    | RMEQ   | Var RB | ΔMAPE                 | MAPE   | -2Log(llh) | FPE    | AIC    | AICC   | SBC     |
| (0.0.0)(0.0.0) <sup>d</sup> | 6266.13           | 130.54 | 11.43  | 131.20 | 149.60                | 71.87  | 370.22     | 136.10 | 376.22 | 376.77 | 381.84  |
| (0.0.0)(0.1.1) <sup>d</sup> | 4584.07           | 104.18 | 10.21  | 148.00 | 388.52                | 143.82 | 331.94     | 104.18 | 337.94 | 338.54 | 343.29  |
| (0.0.0)(1.1.0) <sup>d</sup> | 5306.45           | 120.60 | 10.98  | 148.62 | 303.22                | 67.02  | 337.00     | 144.72 | 343.00 | 343.60 | 348.36  |
| (0.0.0)(1.1.1) <sup>d</sup> | 4396.16           | 99.91  | 10.00  | 147.97 | 474.39                | 81.16  | 330.60     | 119.90 | 338.60 | 339.63 | 345.74  |
| (0.0.1)(0.0.0) <sup>d</sup> | 6452.93           | 134.44 | 11.59  | 135.39 | 150.47                | 82.76  | 371.59     | 134.44 | 377.59 | 378.13 | 383.20  |
| (0.0.1)(0.0.1) <sup>d</sup> | 6452.93           | 134.44 | 11.59  | 135.39 | 150.47                | 82.76  | 371.59     | 134.44 | 377.59 | 378.13 | 383.20  |
| (0.0.1)(0.1.0) <sup>d</sup> | 5973.29           | 135.76 | 11.65  | 143.42 | 376.51                | 51.74  | 340.99     | 135.76 | 346.99 | 347.59 | 352.34  |
| (0.0.1)(0.1.1) <sup>d</sup> | 4403.87           | 100.09 | 10.00  | 141.87 | 504.12                | 144.83 | 330.23     | 100.09 | 340.23 | 341.81 | 349.15  |
| (0.0.1)(1.1.0) <sup>d</sup> | 5144.74           | 116.93 | 10.81  | 142.35 | 463.78                | 64.17  | 335.56     | 140.31 | 343.56 | 344.58 | 350.69  |
| (0.0.1)(1.1.1) <sup>d</sup> | 4237.39           | 96.30  | 9.81   | 141.73 | 592.31                | 83.22  | 329.01     | 115.57 | 341.01 | 343.28 | 351.72  |
| (0.1.0)(0.1.0) <sup>d</sup> | 5867.95           | 136.46 | 11.68  | 407.91 | 204.48                | 129.99 | 334.54     | 136.46 | 340.54 | 341.15 | 345.82  |
| (0.1.0)(0.1.1) <sup>d</sup> | 7258.75           | 168.81 | 12.99  | 237.27 | 827.28                | 187.32 | 345.26     | 168.81 | 351.26 | 351.87 | 356.54  |
| (0.1.0)(1.1.0) <sup>d</sup> | 8652.92           | 201.23 | 14.19  | 237.35 | 472.82                | 147.55 | 350.98     | 242.51 | 356.98 | 357.59 | 362.26  |
| (0.1.0)(1.1.1) <sup>d</sup> | 7036.32           | 163.64 | 12.79  | 236.78 | 924.13                | 199.61 | 344.35     | 197.20 | 352.35 | 353.40 | 359.39  |
| (0.1.1)(0.0.0) <sup>d</sup> | 6063.49           | 129.01 | 11.36  | 129.11 | 115.19                | 59.98  | 362.52     | 129.01 | 368.52 | 369.07 | 368.52  |
| (0.1.1)(0.1.0) <sup>d</sup> | 5867.95           | 136.46 | 11.68  | 407.91 | 204.48                | 129.99 | 334.54     | 136.46 | 340.54 | 341.15 | 345.82  |
| (0.1.1)(0.1.1) <sup>d</sup> | 4464.88           | 103.85 | 10.19  | 146.20 | 711.40                | 78.65  | 324.82     | 103.83 | 334.82 | 336.44 | 343.626 |
| (0.1.1)(1.1.1) <sup>d</sup> | 5626.70           | 130.85 | 11.44  | 145.94 | 401.72                | 92.97  | 333.95     | 157.70 | 345.95 | 348.28 | 356.52  |
| (1.0.0)(0.0.0) <sup>d</sup> | 6266.13           | 130.54 | 11.43  | 131.20 | 149.60                | 71.87  | 370.22     | 136.10 | 376.22 | 376.77 | 381.84  |
| (1.0.0)(0.1.0) <sup>d</sup> | 5940.00           | 135.00 | 11.62  | 142.77 | 760.94                | 47.66  | 340.75     | 141.28 | 346.75 | 347.35 | 352.10  |
| (1.0.0)(0.1.1) <sup>d</sup> | 4396.24           | 99.91  | 10.00  | 141.39 | 580.82                | 78.40  | 330.13     | 104.56 | 338.13 | 339.15 | 345.27  |
| (1.0.0)(1.1.0) <sup>d</sup> | 5132.95           | 116.66 | 10.80  | 141.84 | 622.99                | 62.18  | 335.44     | 146.57 | 345.44 | 347.02 | 354.36  |
| (1.0.0)(1.1.1) <sup>d</sup> | 4233.36           | 96.21  | 9.81   | 141.24 | 660.33                | 82.57  | 328.94     | 120.88 | 340.94 | 343.21 | 351.65  |
| (1.0.1)(0.0.0) <sup>d</sup> | 6054.64           | 126.14 | 11.23  | 126.22 | 170.90                | 63.33  | 368.81     | 131.51 | 376.81 | 377.74 | 384.30  |
| (1.0.1)(0.1.0) <sup>d</sup> | 5827.14           | 132.44 | 11.51  | 141.89 | 869.64                | 51.01  | 340.00     | 138.59 | 348.00 | 349.03 | 355.14  |
| (1.0.1)(0.1.1) <sup>d</sup> | 4396.87           | 99.93  | 10.00  | 141.06 | 592.49                | 77.60  | 330.125    | 104.58 | 342.13 | 344.40 | 352.83  |
| (1.0.1)(1.1.0) <sup>d</sup> | 5109.61           | 116.13 | 10.78  | 141.39 | 816.97                | 59.91  | 335.29     | 145.90 | 347.29 | 349.57 | 358.00  |
| (1.0.1)(1.1.1) <sup>d</sup> | 4518.17           | 102.69 | 10.13  | 140.89 | 839.92                | 132.28 | 331.48     | 129.02 | 347.48 | 351.60 | 361.76  |
| (1.1.0)(0.0.0) <sup>d</sup> | 7656.74           | 162.91 | 12.76  | 162.95 | 286.51                | 90.47  | 372.93     | 169.99 | 378.93 | 379.49 | 384.48  |
| (1.1.0)(0.1.0) <sup>d</sup> | 8002.45           | 186.10 | 13.64  | 197.48 | 284.99                | 119.73 | 346.94     | 194.97 | 352.94 | 353.56 | 358.22  |
| (1.1.0)(0.1.1) <sup>d</sup> | 6105.12           | 141.98 | 11.92  | 196.97 | 1016.17               | 167.31 | 337.69     | 148.74 | 345.69 | 346.74 | 352.74  |
| (1.1.0)(1.0.0) <sup>d</sup> | 7656.74           | 162.91 | 12.76  | 162.95 | 286.51                | 90.47  | 372.93     | 169.99 | 378.93 | 379.49 | 384.48  |
| (1.1.0)(1.1.0) <sup>d</sup> | 7129.97           | 165.81 | 12.877 | 197.20 | 1466.47               | 157.38 | 342.90     | 209.45 | 352.90 | 354.52 | 361.71  |
| (1.1.0)(1.1.1) <sup>d</sup> | 5921.23           | 137.70 | 11.73  | 196.56 | 1121.79               | 177.82 | 336.84     | 173.94 | 348.84 | 351.17 | 359.41  |
| (1.1.1)(0.0.0) <sup>d</sup> | 6058.94           | 128.91 | 11.35  | 129.06 | 112.72                | 59.83  | 362.48     | 134.52 | 370.48 | 371.44 | 377.88  |
| (1.1.1)(0.1.0) <sup>d</sup> | 5857.19           | 136.21 | 11.67  | 394.41 | 231.21                | 124.49 | 334.49     | 142.70 | 342.49 | 343.54 | 349.54  |
| (1.1.1)(0.1.1) <sup>d</sup> | 4401.96           | 102.37 | 10.12  | 287.28 | 816.16                | 114.86 | 324.44     | 107.25 | 336.44 | 338.78 | 347.01  |
| (1.1.1)(1.1.0) <sup>d</sup> | 23591.61          | 548.64 | 23.42  | 340.89 | 2.32·10 <sup>16</sup> | 264.85 | 395.04     | 693.02 | 407.04 | 409.37 | 417.60  |
| (1.1.1)(1.1.1) <sup>d</sup> | 4227.23           | 98.31  | 9.92   | 144.21 | 969.20                | 91.56  | 323.32     | 124.18 | 339.32 | 343.56 | 353.41  |
| (2.0.0)(0.0.0) <sup>d</sup> | 6233.30           | 129.86 | 11.40  | 130.20 | 144.64                | 68.35  | 369.98     | 141.15 | 377.98 | 378.91 | 385.47  |
| (2.0.0)(0.1.0) <sup>d</sup> | 5930.58           | 134.79 | 11.61  | 142.59 | 1285.02               | 46.38  | 340.68     | 147.62 | 348.68 | 349.71 | 355.82  |
| (2.0.0)(0.1.1) <sup>d</sup> | 4396.69           | 99.92  | 10.00  | 141.25 | 590.64                | 77.78  | 330.13     | 109.44 | 340.13 | 341.70 | 349.05  |
| (2.0.0)(0.1.2) <sup>d</sup> | 3960.77           | 90.02  | 9.49   | 134.87 | 802.42                | 90.76  | 326.97     | 98.59  | 338.97 | 341.24 | 349.68  |
| (2.0.0)(1.1.0) <sup>d</sup> | 5131.03           | 116.61 | 10.80  | 141.69 | 696.71                | 60.52  | 335.42     | 153.44 | 347.42 | 349.69 | 358.13  |
| (2.0.0)(1.1.1) <sup>d</sup> | 4233.16           | 96.21  | 9.81   | 141.10 | 659.43                | 82.63  | 328.94     | 126.59 | 342.94 | 346.05 | 355.43  |
| (2.0.0)(1.1.2) <sup>d</sup> | 4293.13           | 97.57  | 9.88   | 131.85 | 536.33                | 76.57  | 329.41     | 128.38 | 345.41 | 349.52 | 359.68  |
| (2.0.0)(2.1.0) <sup>d</sup> | 3553.87           | 80.77  | 8.99   | 136.51 | 673.77                | 85.14  | 323.16     | 128.28 | 337.16 | 340.28 | 349.65  |
| (2.0.0)(2.1.2) <sup>d</sup> | 3097.71           | 70.40  | 8.39   | 120.73 | 626.72                | 171.39 | 320.77     | 111.82 | 338.77 | 344.07 | 354.83  |
| (2.0.1)(0.0.0) <sup>d</sup> | 6049.19           | 126.02 | 11.23  | 126.15 | 158.65                | 61.74  | 368.74     | 136.98 | 378.74 | 380.17 | 388.10  |
| (2.0.1)(0.1.0) <sup>d</sup> | 5823.82           | 132.36 | 11.50  | 141.50 | 851.32                | 49.56  | 339.97     | 144.97 | 349.97 | 351.55 | 358.89  |
| (2.0.1)(0.1.1) <sup>d</sup> | 12496.60          | 284.01 | 16.85  | 140.76 | 362.82                | 221.56 | 377.33     | 311.06 | 391.33 | 394.44 | 403.82  |
| (2.0.1)(0.1.2) <sup>d</sup> | 3979.01           | 90.43  | 9.51   | 123.90 | 710.11                | 132.22 | 328.33     | 99.04  | 344.33 | 348.44 | 358.60  |
| (2.0.1)(1.1.0) <sup>d</sup> | 5100.95           | 115.93 | 10.77  | 141.04 | 737.04                | 59.23  | 335.21     | 152.54 | 349.21 | 352.32 | 361.70  |
| (2.0.1)(1.1.1) <sup>d</sup> | 11961.09          | 271.84 | 16.49  | 140.56 | 375.46                | 235.43 | 376.74     | 357.69 | 394.74 | 400.04 | 410.80  |
| (2.0.1)(2.1.0) <sup>d</sup> | 13174.19          | 299.41 | 17.30  | 135.46 | 351.54                | 206.23 | 378.45     | 475.54 | 394.45 | 398.56 | 408.72  |
| (2.0.2)(0.0.0) <sup>d</sup> | 5454.01           | 113.63 | 10.66  | 125.64 | 9144.53               | 139.76 | 368.74     | 123.51 | 380.74 | 382.79 | 391.96  |
| (2.0.2)(0.1.0) <sup>d</sup> | 15038.27          | 341.78 | 18.49  | 130.27 | 358.39                | 190.81 | 383.68     | 374.33 | 395.68 | 397.95 | 406.38  |
| (2.0.2)(0.1.1) <sup>d</sup> | 11333.99          | 257.59 | 16.05  | 129.43 | 393.81                | 178.69 | 375.80     | 282.12 | 391.80 | 395.92 | 406.08  |
| (2.0.2)(0.1.2) <sup>d</sup> | 10162.13          | 230.96 | 15.20  | 233.13 | 367.90                | 173.30 | 375.16     | 252.95 | 393.16 | 398.45 | 409.22  |

|                             |          |        |       |        |                       |        |        |        |        |        |        |
|-----------------------------|----------|--------|-------|--------|-----------------------|--------|--------|--------|--------|--------|--------|
| (2.0.2)(1.1.0) <sup>a</sup> | 5712.31  | 129.83 | 11.39 | 129.83 | 736.05                | 52.86  | 340.76 | 170.82 | 356.76 | 360.88 | 371.04 |
| (2.0.2)(1.1.1) <sup>a</sup> | 4020.16  | 91.37  | 9.56  | 129.16 | 588.29                | 78.06  | 327.64 | 120.22 | 347.64 | 354.31 | 365.48 |
| (2.0.2)(2.1.0) <sup>a</sup> | 13017.06 | 295.84 | 17.20 | 122.48 | 326.24                | 188.17 | 378.03 | 469.87 | 396.03 | 401.33 | 412.09 |
| (2.1.0)(0.0.0) <sup>a</sup> | 6030.30  | 128.30 | 11.33 | 130.60 | 169.81                | 88.85  | 362.38 | 139.71 | 370.38 | 371.33 | 377.78 |
| (2.1.0)(0.1.0) <sup>a</sup> | 6563.43  | 152.64 | 12.35 | 164.64 | 573.86                | 100.00 | 338.96 | 167.53 | 346.96 | 348.01 | 354.00 |
| (2.1.0)(0.1.1) <sup>a</sup> | 5319.15  | 123.70 | 11.12 | 163.86 | 1731.52               | 132.44 | 331.76 | 135.77 | 341.76 | 343.38 | 350.56 |
| (2.1.0)(0.1.2) <sup>a</sup> | 4593.35  | 106.82 | 10.34 | 119.21 | 1058.62               | 113.80 | 332.06 | 117.24 | 344.06 | 346.40 | 354.63 |
| (2.1.0)(1.1.0) <sup>a</sup> | 6194.60  | 144.06 | 12.00 | 164.37 | 1574.04               | 123.33 | 336.74 | 190.78 | 348.74 | 351.07 | 359.30 |
| (2.1.0)(1.1.1) <sup>a</sup> | 12321.08 | 286.54 | 16.93 | 286.54 | 9.33·10 <sup>16</sup> | 200.24 | 375.29 | 379.47 | 389.29 | 392.49 | 401.62 |
| (2.1.0)(1.1.2) <sup>a</sup> | 5387.80  | 125.30 | 11.19 | 120.17 | 1146.56               | 134.22 | 341.00 | 165.93 | 357.00 | 361.24 | 371.09 |
| (2.1.0)(2.1.0) <sup>a</sup> | 4289.72  | 99.76  | 9.99  | 152.54 | 1380.72               | 136.43 | 324.90 | 160.22 | 338.90 | 342.10 | 351.23 |
| (2.1.0)(2.1.1) <sup>a</sup> | 4446.53  | 103.41 | 10.17 | 103.41 | 1855.43               | 137.76 | 334.14 | 166.08 | 350.14 | 354.38 | 364.23 |
| (2.1.1)(0.0.0) <sup>a</sup> | 5708.62  | 121.46 | 11.02 | 122.21 | 171.31                | 76.26  | 359.84 | 132.26 | 369.84 | 371.30 | 379.09 |
| (2.1.1)(0.1.0) <sup>a</sup> | 5657.82  | 131.58 | 11.47 | 144.85 | 248.57                | 89.69  | 332.95 | 144.41 | 342.95 | 344.57 | 351.76 |
| (2.1.1)(0.1.1) <sup>a</sup> | 4396.94  | 102.25 | 10.11 | 144.46 | 798.55                | 86.42  | 324.24 | 112.23 | 338.24 | 341.44 | 350.57 |
| (2.1.1)(0.1.2) <sup>a</sup> | 10980.06 | 255.35 | 15.98 | 120.69 | 7.46·10 <sup>16</sup> | 211.24 | 371.17 | 280.26 | 387.17 | 391.41 | 401.26 |
| (2.1.1)(1.0.0) <sup>a</sup> | 5708.62  | 121.46 | 11.02 | 122.21 | 171.31                | 76.26  | 359.84 | 132.26 | 369.84 | 371.30 | 379.09 |
| (2.1.1)(1.1.0) <sup>a</sup> | 5133.04  | 119.37 | 10.93 | 144.66 | 928.86                | 77.20  | 329.43 | 158.09 | 343.43 | 346.63 | 355.76 |
| (2.1.1)(1.1.1) <sup>a</sup> | 10992.92 | 255.65 | 15.99 | 125.51 | 7.39·10 <sup>16</sup> | 210.41 | 371.16 | 338.56 | 389.16 | 394.62 | 405.01 |
| (2.1.1)(2.1.0) <sup>a</sup> | 3583.60  | 83.34  | 9.13  | 138.48 | 1129.63               | 109.93 | 318.23 | 133.85 | 334.23 | 338.47 | 348.32 |
| (2.1.2)(0.0.0) <sup>a</sup> | 5506.99  | 117.17 | 10.82 | 117.23 | 213.34                | 79.71  | 358.47 | 127.59 | 370.47 | 372.57 | 381.57 |
| (2.1.2)(0.1.0) <sup>a</sup> | 5362.59  | 124.71 | 11.17 | 132.86 | 452.83                | 80.45  | 332.37 | 136.88 | 344.37 | 346.70 | 354.94 |
| (2.1.2)(0.1.1) <sup>a</sup> | 4735.93  | 110.14 | 10.49 | 131.93 | 619.81                | 73.40  | 327.23 | 120.88 | 343.23 | 347.47 | 357.32 |
| (2.1.2)(0.1.2) <sup>a</sup> | 10889.45 | 253.24 | 15.91 | 119.81 | 9.61·10 <sup>16</sup> | 216.08 | 370.43 | 277.95 | 388.43 | 393.88 | 404.28 |
| (2.1.2)(1.1.0) <sup>a</sup> | 5684.74  | 132.20 | 11.50 | 132.20 | 580.33                | 74.40  | 334.98 | 175.08 | 350.98 | 355.21 | 365.07 |
| (2.1.2)(1.1.1) <sup>a</sup> | 5161.60  | 120.04 | 10.96 | 131.57 | 585.54                | 92.47  | 332.85 | 158.97 | 352.85 | 359.73 | 370.47 |
| (2.1.2)(2.1.0) <sup>a</sup> | 3270.54  | 76.06  | 8.72  | 124.40 | 1278.96               | 108.35 | 316.32 | 122.16 | 334.32 | 339.78 | 350.17 |
| (2.1.2)(2.1.2) <sup>a</sup> | 9226.52  | 214.57 | 14.65 | 87.10  | 7.65·10 <sup>16</sup> | 194.35 | 368.38 | 344.61 | 392.38 | 402.78 | 413.52 |
| (3.0.0)(0.1.1) <sup>a</sup> | 4396.16  | 99.91  | 10.00 | 140.28 | 553.58                | 77.57  | 330.11 | 114.53 | 342.11 | 344.38 | 352.82 |

<sup>a</sup> AIC: Akaike information criterion; AICc: corrected AIC; FPE: final prediction error; MAPE: mean absolute percentage error; MSE: mean square error; RMSE: root MSE; SBC: Schwartz Bayesian criterion/Bayesian information criterion; SSE: sum of square errors.
